# Supplementary material
Source: PubMed Central journal article supplement (PMC3993495)
Supplement: JCM.02669-13_zjm999093256so1.pdf [file JCM.02669-13_zjm999093256so1.pdf]

<sup>a</sup> Keys to Table S1

|            |                                                                                                                               |
|------------|-------------------------------------------------------------------------------------------------------------------------------|
| ST types   | MLST of 15 housekeeping genes                                                                                                 |
| Lineage    | as figure 1A                                                                                                                  |
| Cluster    | as figure 1A                                                                                                                  |
| <i>opt</i> | <i>opt</i> alleles on plasmid pSFVv_2 and pSFYv_2, <i>optII</i> * indicated the 3 isolates carries a defective <i>optII</i> . |

| Antibiotics symbol | Name                          | Breakpoint (mm) for resistance, intermediate and susceptible |
|--------------------|-------------------------------|--------------------------------------------------------------|
| AMP                | Ampicillin                    | ≥ 17, 14–16, ≤ 13                                            |
| PIP                | Piperacillin                  | ≥ 21, 18–20, ≤ 17                                            |
| AMC                | Amoxicillin-clavulanic acid   | ≥ 18, 14–17, ≤ 13                                            |
| SAM                | Ampicillin-sulbactam          | ≥ 15, 12–14, ≤ 11                                            |
| TIM                | Ticarcillin-clavulanic acid   | ≥ 20, 15–19, ≤ 14                                            |
| ATM                | Aztreonam                     | ≥ 21, 18–20, ≤ 17                                            |
| CXM                | Cefuroxime                    | ≥ 18, 15–17, ≤ 14                                            |
| CFP                | Cefoperazone                  | ≥ 21, 16–20, ≤ 15                                            |
| FEP                | Cefepime                      | ≥ 18, 15–17, ≤ 14                                            |
| CTX                | Cefotaxime                    | ≥ 26, 23–25, ≤ 22                                            |
| CIP                | Ciprofloxacin                 | ≥ 21, 16–20, ≤ 15                                            |
| NOR                | Norfloxacin                   | ≥ 17, 13–16, ≤ 12                                            |
| OFX                | Ofloxacin                     | ≥ 16, 13–15, ≤ 12                                            |
| LVX                | Levofloxacin                  | ≥ 17, 14–16, ≤ 13                                            |
| NAL                | Nalidixic acid                | ≥ 19, 14–18, ≤ 13                                            |
| SXT                | Trimethoprim-sulfamethoxazole | ≥ 16, 11–15, ≤ 10                                            |
| TMP                | Trimethoprim                  | ≥ 16, 11–15, ≤ 10                                            |
| F                  | Furazolidone                  | ≥ 17, 15–16, ≤ 14                                            |
| TET                | Tetracycline                  | ≥ 15, 12–14, ≤ 11                                            |
| DOX                | Doxycycline                   | ≥ 14, 11–13, ≤ 10                                            |
| MIN                | Minocycline                   | ≥ 16, 13–15, ≤ 12                                            |
| KAN                | Kanamycin                     | ≥ 18, 14–17, ≤ 13                                            |
| STR                | Streptomycin                  | ≥ 15, 12–14, ≤ 11                                            |
| GEN                | Gentamicin                    | ≥ 15, 13–14, ≤ 12                                            |
| TOB                | Tobramycin                    | ≥ 15, 13–14, ≤ 12                                            |
| AMK                | Amikacin                      | ≥ 17, 15–16, ≤ 14                                            |
| NET                | Netilmicin                    | ≥ 15, 13–14, ≤ 12                                            |
| CHL                | Chloramphenicol               | ≥ 18, 13–17, ≤ 12                                            |
| PB                 | Polymyxin B                   | ≥ 11, –, ≤ 10                                                |
| IPM                | Imipenem                      | ≥ 16, 14–15, ≤ 13                                            |

| Antibiotic resistance genes | Resistance                 | Location    |
|-----------------------------|----------------------------|-------------|
| <i>aadA2</i>                | streptomycin               | SRL         |
| <i>oxa-1</i>                | ampicillin                 | SRL         |
| <i>cat</i>                  | chloramphenicol            | SRL         |
| <i>tetR</i>                 |                            | SRL         |
| <i>tetA</i>                 | tetracycline               | SRL         |
| <i>tetC</i>                 |                            | SRL         |
| <i>tetD</i>                 |                            | SRL         |
| <i>dfrA1</i>                | trimethoprim               | Tn7         |
| <i>sat1</i>                 | streptothricin             | Tn7         |
| <i>aadA1</i>                | streptomycin/spectinomycin | Tn7         |
| <i>dfrA5</i>                | trimethoprim               | X12868.1    |
| <i>blaCTX-M-14</i>          | Cephalosporins             | NC_019071.1 |
| <i>blaTEM-1</i>             | Ampicillin                 | NC_010558.1 |
| <i>blaCTX-M-3</i>           | Ampicillin                 | NC_019090.1 |
| <i>qnrS</i>                 | quinolones                 | NC_010886.1 |
| <i>qepA</i>                 | quinolones                 | NC_020278.2 |
| <i>aac(6)-Ib-cr</i>         | quinolones                 | NC_011617.1 |

**Other notes**

1. antibiotic susceptibility: R = resistance; S = sensitive; I= intermediate, based on breakpoints listed above.

For *Salmonella* spp. and *Shigella* spp., aminoglycosides, as well as first- and second-generation cephalosporins and cephamycins, may appear active in vitro but are not effective clinically and should not be reported as susceptible.

2. SRL, Tn7, *dfrA5*, *gyrA*, *blaCTX-M-14*, *blaTEM-1*, *blaCTX-M-3*, *qnrS*, *qepA* and *aac(6)-Ib-cr* coverage. The contigs were mapped to the SRL, Tn7 *dfrA5*, *gyrA*, *blaCTX-M-14*, *blaTEM-1*, *blaCTX-M-3*, *qnrS*, *qepA* and *aac(6)-Ib-cr* reference. Percent coverage was calculated based whether any sequence mapped to reference. 0 indicated no or few mapped to reference, "no" indicated no mutation on *gyrA*.

Table S2 Primers SNP genotyping using cluster-specific SNPs

| SNPs no. | Upstream Primer                 | Downstream Primer               | Base extension Primer for the SNP |
|----------|---------------------------------|---------------------------------|-----------------------------------|
| 1        | ACGTTGGATGTTATCTGTCGGTTTCACCGC  | ACGTTGGATGATTACCGGTGATGTCGTGGC  | GGATGTCGTGGCACTGGA                |
| 3        | ACGTTGGATGATTCCCTTCACGACAACCTGC | ACGTTGGATGGGGAATTCCGCATTTCTCAC  | TACCCAATTCTGACAGTTA               |
| 4        | ACGTTGGATGTGTTGAGATTGCCATCAACC  | ACGTTGGATGGTAGTCACTTACCTTCACCG  | TTCCCCGTTAGCCAAACCTGC             |
| 5        | ACGTTGGATGAGCTCGTTGTGCTGAATCGG  | ACGTTGGATGCTGGATTCATGCGGGTATTC  | GGGCCGGTGATCCCGATTCAGGCCTA        |
| 6        | ACGTTGGATGAAACTGGTGTTCAGGAAGG   | ACGTTGGATGGGTGGTCAAAGCATGGTTAC  | TGGTTACCAACAATGTTAAT              |
| 7        | ACGTTGGATGGCATCCGCGATGATTTTCTG  | ACGTTGGATGATGAAGGCGGTATTCTCCTG  | TTATCCTGTTCGGTCTGATG              |
| 9        | ACGTTGGATGGCTTCAACAGCAGCACAAAC  | ACGTTGGATGACCCATATCTTGACCAGGTG  | TTATCACAAACCGGAACCACAA            |
| 10       | ACGTTGGATGTCGTTGACGTTCAATCCAGC  | ACGTTGGATGAGCGCGTTACGCAATAAACC  | GATGACCAGTTTCACCC                 |
| 13       | ACGTTGGATGCAGAATCTTAAACAGGCTCG  | ACGTTGGATGACTGAAGGTCTTCGGTAAGG  | TCGGCAAACTAGTTGAC                 |
| 14       | ACGTTGGATGACAATGGCTTTGAGGTCGGG  | ACGTTGGATGATACGTATAGTCCTCTCTGG  | GGCGTGATTCTCTGAGTTATATGCT         |
| 15       | ACGTTGGATGCCGCGACTATTCAGCAAAAAG | ACGTTGGATGCCGTTTTTCGACAATTGCCAC | CCACCGGCATTTTCGC                  |

|     |                                 |                                 |                              |
|-----|---------------------------------|---------------------------------|------------------------------|
| 16  | ACGTTGGATGCAACCATCTCGTATATTAACC | ACGTTGGATGCCAGAAAAAATTTCTCGATG  | GGTTTCATAACATTATATTTAATTGCTG |
| 17  | ACGTTGGATGGGCAATCAGATCTTTCAGGG  | ACGTTGGATGGATTTTCGGCGATTCAGGAAG | ATGGTGATGATAGAGATCACT        |
| 18  | ACGTTGGATGTGTCTGCACTGTGCGAAATG  | ACGTTGGATGATATCGCGACCAATCCGTTT  | CGTGATGCGGATGAAT             |
| 19  | ACGTTGGATGATGCAGCATCTACGCATTCC  | ACGTTGGATGATAAGATGGGTTTGCTGCGG  | CCCGCACCCGCGCTCATTA          |
| 20  | ACGTTGGATGCAAAACCTGTTGACAGAAAG  | ACGTTGGATGAAAAGCGCCATAAGGACTC   | GAGGACTCCTTGATTTATTATGTA     |
| 21  | ACGTTGGATGGCATGACCTTTGCCAACTTC  | ACGTTGGATGGTAGTTAAAAGGTGGAGCGG  | GCGGAAAGCAAAAAGGCCATTGA      |
| 22  | ACGTTGGATGTGTAGATCAGCATGGAGCCG  | ACGTTGGATGTTTCCTGAAACACAACCCGC  | ACCCGCAGAATCCGT              |
| 23* | CAGAGTGCAAGCCAATGCTA            | CGCGATGTTGACAAGAAGAG            | NA                           |
| 24* | TACCCCGCCTCTCTTCTGACT           | TGGTAGCGCAATTGGCAA              | NA                           |
| 25* | CTGGCGATTACAAATCACGA            | TGTGACCTGGGTCACGAATTA           | NA                           |
| 26* | TGACGTTGGCCTGAAGTAAGA           | ATCACCAGCCTACAGGCTAAA           | NA                           |
| 27* | ACCGCAACCAATCACCGTAT            | TGGAGCAACGCAATGGTTAG            | NA                           |

---

\*primers for PCR sequencing

Table S3 List of SNPs on pSFXv\_2

| Chromosome SNP cluster | Lab NO.     | no. of isolates | Sero type | SNP on pSFXv_2 <sup>a</sup> |    |     |     |     |     |     |     |      |      |      |      |      |      |      |      |      |      |      |      |      |      |      |      |      |      |      |  |
|------------------------|-------------|-----------------|-----------|-----------------------------|----|-----|-----|-----|-----|-----|-----|------|------|------|------|------|------|------|------|------|------|------|------|------|------|------|------|------|------|------|--|
|                        |             |                 |           | 68                          | 69 | 181 | 330 | 362 | 371 | 462 | 798 | 1368 | 1396 | 1628 | 2226 | 2459 | 2987 | 3007 | 3124 | 3126 | 3315 | 3318 | 3304 | 3604 | 3787 | 3972 | 4000 | 4535 | 5606 | 5745 |  |
| 2002017                |             |                 | Xv        | T                           | T  | G   | G   | G   | G   | C   | A   | C    | C    | C    | A    | T    | C    | C    | G    | G    | C    | G    | T    | A    | C    | C    | A    | C    | T    | A    |  |
| Cluster1               | Shi06HN347  | 1               | Xv        | .                           | .  | C   | T   | A   | A   | .   | C   | .    | .    | .    | .    | .    | .    | .    | .    | .    | .    | .    | .    | .    | .    | .    | .    | .    | .    | .    |  |
|                        | Shi06HN344  | 1               | X         | .                           | .  | C   | T   | A   | A   | .   | C   | .    | .    | .    | .    | .    | .    | .    | .    | .    | .    | .    | .    | .    | .    | .    | .    | .    | .    | .    |  |
|                        | 12 isolates | 12              | Xv        | G                           | G  | C   | T   | A   | A   | .   | C   | .    | .    | .    | .    | .    | .    | .    | .    | .    | .    | .    | .    | .    | .    | .    | .    | .    | .    | .    |  |
|                        | 2002141     | 1               | X         | G                           | G  | C   | T   | A   | A   | .   | C   | .    | .    | .    | .    | .    | .    | .    | .    | .    | .    | .    | .    | .    | .    | .    | .    | .    | .    | .    |  |
| Non-clustered          | 2001044     | 1               | Xv        | G                           | G  | C   | T   | A   | A   | .   | C   | .    | .    | .    | .    | .    | .    | .    | .    | .    | .    | .    | .    | .    | .    | .    | .    | .    | .    | .    |  |
| Cluster2               | 3 isolates  | 3               | Xv        | G                           | G  | C   | T   | A   | A   | .   | C   | .    | .    | .    | .    | .    | .    | .    | .    | .    | .    | .    | .    | .    | .    | .    | .    | .    | .    | .    |  |
|                        | 3 isolates  | 3               | Xv        | G                           | G  | C   | T   | A   | A   | .   | C   | .    | .    | .    | .    | .    | .    | .    | .    | .    | .    | .    | .    | .    | .    | G    | .    | .    | .    | .    |  |
| Cluster3               | 4 isolates  | 4               | Xv        | G                           | G  | C   | T   | A   | A   | T   | C   | T    | T    | T    | .    | C    | T    | A    | T    | C    | .    | .    | C    | C    | A    | T    | .    | T    | G    | .    |  |
| Extended cluster3      | 2005184     | 1               | X         | .                           | .  | C   | T   | A   | A   | T   | C   | T    | T    | T    | .    | C    | T    | A    | T    | C    | .    | .    | C    | C    | A    | T    | .    | T    | G    | .    |  |
| Non-clustered          | Shi06AH091  | 1               | Xv        | G                           | G  | C   | T   | A   | A   | T   | C   | T    | T    | .    | G    | C    | T    | A    | .    | .    | A    | A    | .    | C    | A    | .    | .    | T    | G    | C    |  |

<sup>a</sup> SNP is named based on base position in the pSFXv\_2 plasmid. Dots represent bases identical to the reference bases.

SNP 3972, 4000 and 4535 located on the *opt* gene.

Nature of SNPs are as follows:

- 68 T→G, 69 T→G, resulting in I21→R
- 181 G→C, resulting in V59→L
- 330 G→T, synonymous SNP
- 362 G→A, resulting in C119→Y
- 371 G→A, resulting in R122→H
- 462 C→T, synonymous SNP
- 798 A→C, resulting in L263→F
- 1368 C→T, synonymous SNP
- 1396 C→T, deletion 450Q
- 1628 C→T, resulting in P524→L
- 2226 A→G, synonymous SNP
- 2459 T→C, resulting in L787→P
- 2987 C→T, resulting in S955→F
- 3007 C→A, resulting in Q962→K
- 3124 G→T, 3126 G→C, resulting in E1000→Y
- 3315 C→A, 3318 G→A, synonymous SNPs
- 3304 T→C, resulting in W1059→R
- 3604 A→C, resulting in T1152→P
- 3787 C→A, resulting in Q1210→K
- 3972 C→T, synonymous SNP
- 4000 A→G, resulting in T1280→A
- 4535 C→T, resulting in A1458→V
- 5606 T→G, deletion 1807L
- 5745 A→C, synonymous SNP



|           |     |    |            |                                     |
|-----------|-----|----|------------|-------------------------------------|
|           |     |    | Anhui (1)  |                                     |
|           | SG4 | 65 | Henan (9)  | A C C C G A A T A G A A C A A C . . |
|           |     |    | Gansu (50) |                                     |
|           |     |    | Anhui (6)  |                                     |
| Cluster 3 | SG5 | 54 | Henan (7)  | A C C C . . . . . . . . . . A A     |
|           |     |    | Gansu (2)  |                                     |
|           |     |    | Anhui (45) |                                     |

---

\* see Table 1 for SNP details. Note that SNPs 2, 8, 11 and 12 were excluded. Dots represent bases identical to the reference bases.
